# Supplementary material
Source: PubMed Central journal article supplement (PMC2441652)

### Supplement figure legends

**Supplement 1. (A) Live imaging of SAOS- $\alpha$ 2 $\beta$ 1 cells transfected with caveolin-GFP (green). Clustered  $\alpha$ 2 $\beta$ 1 integrin ( $\alpha$ 2; red) was followed at different time points, right after binding of the clustering secondary antibody (anti-mouse Alexa 555; red; 0 h) up until 22 h after startup of integrin clustering. The fluorescent images are projections from 3D serial sections from confocal microscope. Colocalizing voxels are visualized below the projections. Bar, 10  $\mu$ m. (B) Rhodamine dextran (0.25 mg/ml; red) was continuously internalized in SAOS- $\alpha$ 2 $\beta$ 1 and HeLa MZ cells during internalization of clustered integrin ( $\alpha$ 2; green) for 1 h. (C) The effect of integrin clustering on the amount of uptake of dextran (rhodamine dextran 0.25 mg/ml; 1 h continuous uptake) was measured in SAOS- $\alpha$ 2 $\beta$ 1 cells (30 cells from three independent experiments). The amount of internalized vesicles have been quantified with the segmentation tool in the **BioimageXD** software. (D) Confocal images of FITC-dextran (0.25 mg/ml) internalization in SAOS- $\alpha$ 2 $\beta$ 1 cells with or without integrin clustering for 2 h (pulse for 1 h and chase for 1 h in medium without dextran). FITC signal was quantified from 10 large areas (200  $\mu$ m x 200  $\mu$ m; larger than the example confocal figures here) for both cases. The amount of fluorescent signal was quantified with the segmentation tool in the **BioimageXD** software. The experiment was done twice. Bars, 10  $\mu$ m.**

**Supplement 2. (A) Confocal fluorescent control images of unclustered  $\alpha$ 2 $\beta$ 1 integrin ( $\alpha$ 2) during GPI-GFP and CTxB internalization between 0 h and 2 h. Images are merged images of the integrin (red) and GPI-GFP (green) or CtXB (green). Here,  $\alpha$ 2 $\beta$ 1 integrin was immunolabeled after fixation and permeabilization. (B) Colocalization of flotillin 1 (green) and EV1 (red) at different time periods p.i. EV1 was first bound on the plasma membrane on ice, excess virus was washed away and EV1 was then internalized at 37°C for different time periods.**

EV1 and flotillin 1 were immunolabeled after fixation and permeabilization. **Colocalizing voxels are shown for each time point.** Bars, 10  $\mu\text{m}$ .

**Supplement 3.** (A) Confocal images of internalized EV1 or clustered  $\alpha 2\beta 1$  integrin ( $\alpha 2$ ) with classical endosomal markers after different time points: early endosome antigen (EEA1), cation independent mannose 6-phosphate receptor (CI-MPR) and CD63. (B) Live-imaging of clustered  $\alpha 2\beta 1$  integrin (green; clustered by goat anti mouse Alexa 488 antibody) with a labeled LysoTracker Red DND99. A time point after 2 h is shown. Bars, 10  $\mu\text{m}$ .

**Supplement 4.** (A) EV1 and  $\alpha 2\beta 1$  integrin were pre-labeled with different sized protein A gold particles (5 nm and 10 nm, respectively) on ice before their internalization at 37°C for 5 and 30 min. In addition, rabbit anti mouse secondary antibody was used to cluster integrin on the plasma membrane before internalization. Here, EV1 and  $\alpha 2\beta 1$  integrin are found in similar endosomes after 5 and 30 min. Bars = 200 nm. (B) The effect of the inhibition of macropinocytic regulators was studied by dextran uptake. Cells were treated with the inhibitors of the amiloride-sensitive  $\text{Na}^+/\text{H}^+$  exchanger (EIPA), PI3K (LY294002) and phosphatidyl inositol specific phospholipase C (U73122) with a 30 min preincubation and followed by drug treatment and rhodamine dextran (0.25 mg/ml) uptake for further 1 hour. As EIPA and PLC seemed to affect the entry of dextran, quantification of their entry was studied. **The amount of fluorescent signal was quantified with the segmentation tool in the BioImageXD software.** (C) Evaluation of the toxic effects of these drugs on cell viability was tested using a commercial cell viability kit (Promega, see Materials and Methods). (D) **Ruthenium red was used to label endosomes that are still connected to the plasma membrane after control and EIPA treatment for 2 h. Clustered  $\alpha 2\beta 1$  integrin is labeled by protein A gold (10 nm). Plasma membrane is lined with dark ruthenium red (arrowheads) whereas integrin positive endosomes (arrows) are devoid of ruthenium red. Bars = 500 nm.**

Supplement 5. **(A) The intensity of phospho Pak1 after overnight starvation (C) and after different periods with EV1 (between 5 min and 2 h) was quantified from 20 cells in confocal microscope images.** The signal was quantified with the segmentation tool in the BiomeX software. The result stands for the number of segmented objects weighed with the object size in pixels  $\pm$  SE. The experiment was done twice. **(B) The effects of actin depolymerizing (cytochalasin D) and stabilizing (jasplakinolide) drugs on EV1 infection were quantified.** For cytochalasin D (cyt D) various pre-incubation periods (0.5 h, 2 h, 4 h) were used whereas for jasplakinolide (jaspla) only 0.5 h preincubation time was used. **(C) The effects of different concentrations of cytochalasin D (1, 2.5, 5, 7.5  $\mu$ g/ml) or jasplakinolide (0.1, 0.25, 0.5 and 0.75  $\mu$ M) on infection were tested. Drugs were administered 30 min before EV1 attachment and the drugs were present through the whole 6 h for the infection. The results in C and D are mean values from calculations of 150 - 200 cells for each case  $\pm$  SE.**

**A**

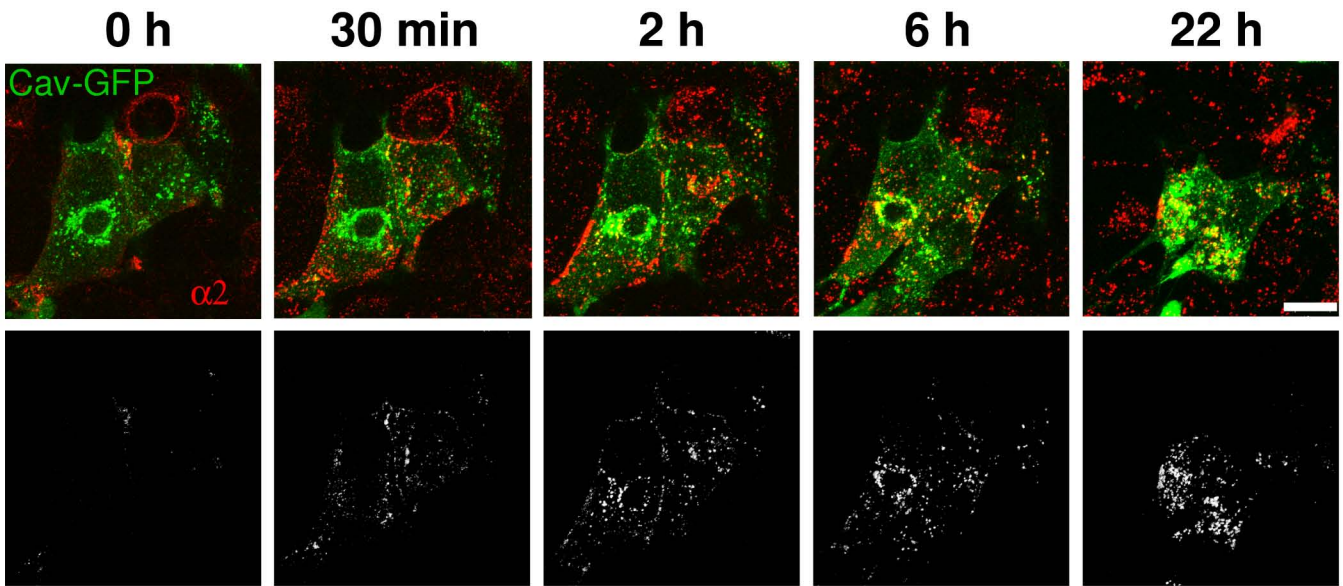

**B**

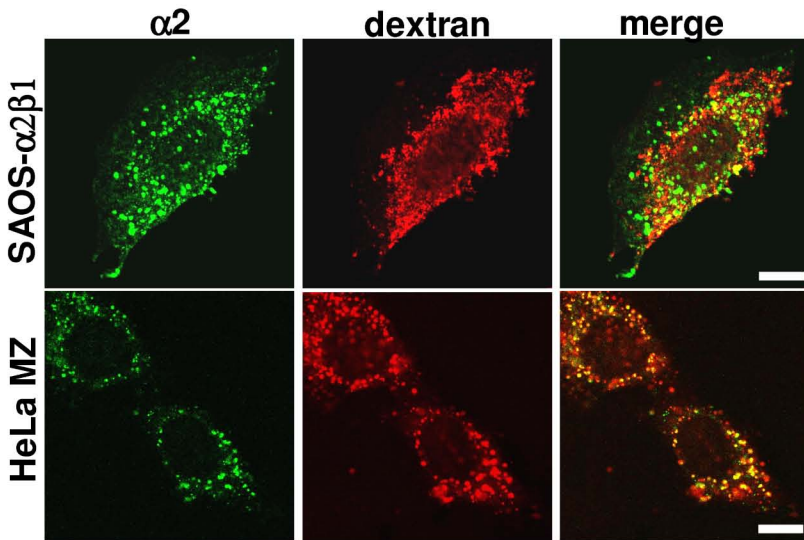

**C**

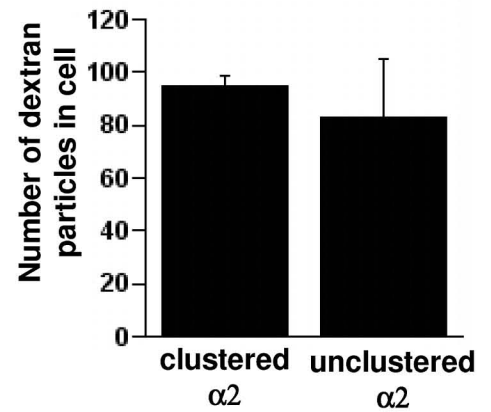

**D**

FITC-dextran +  $\alpha 2$  clustering      FITC-dextran -  $\alpha 2$  clustering

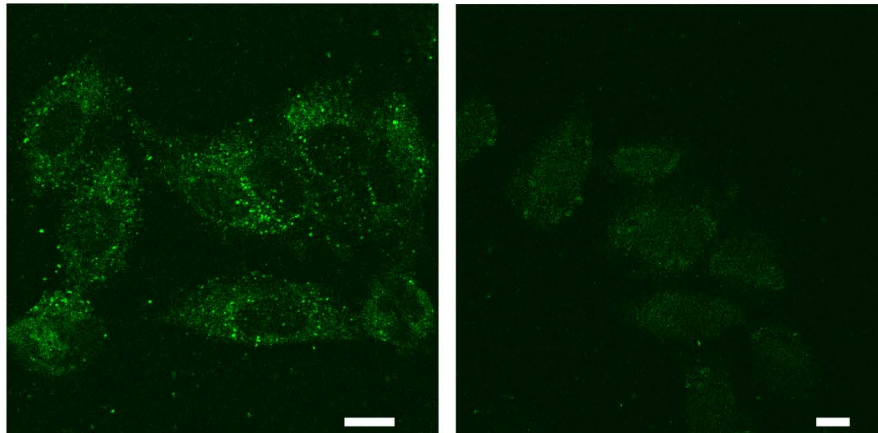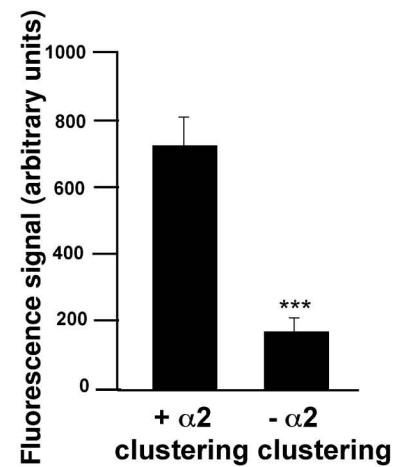

# Suppl. 2. Karjalainen et al.

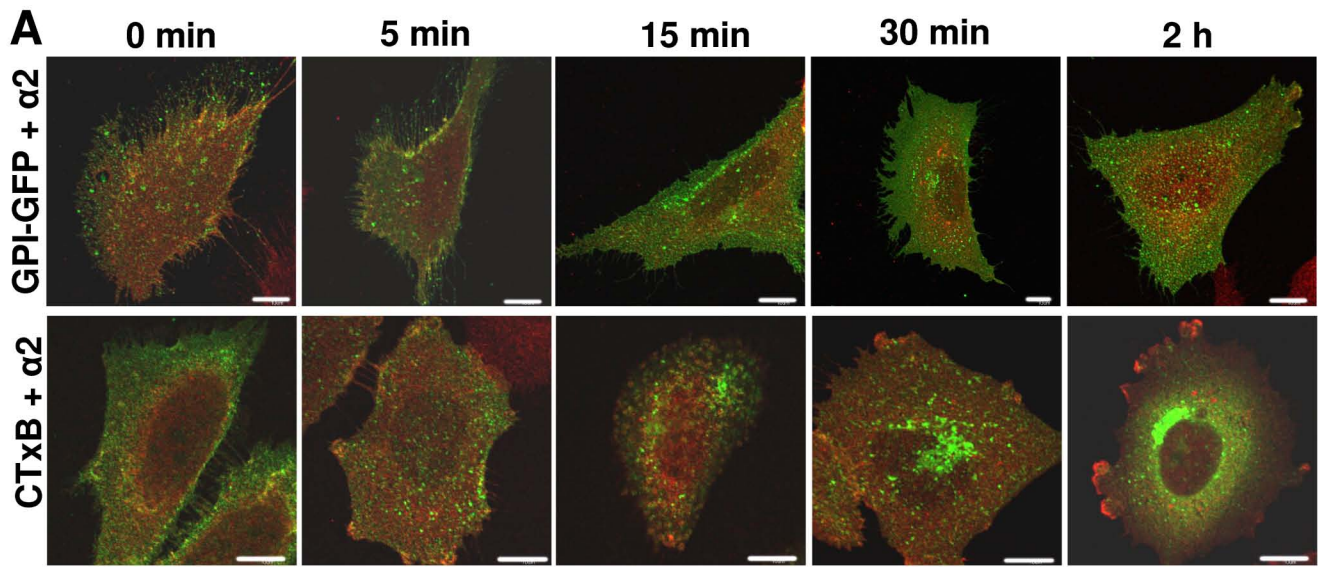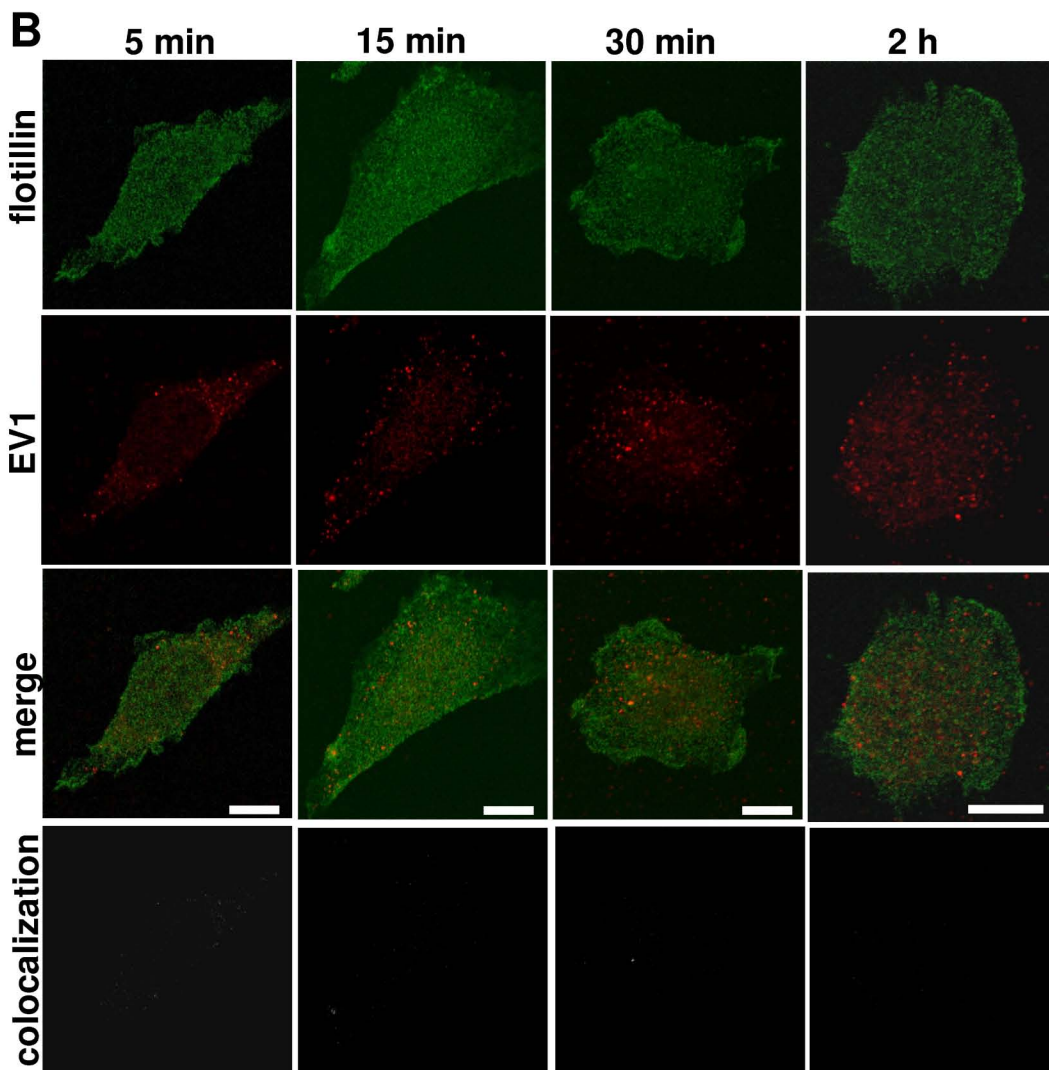



**A**

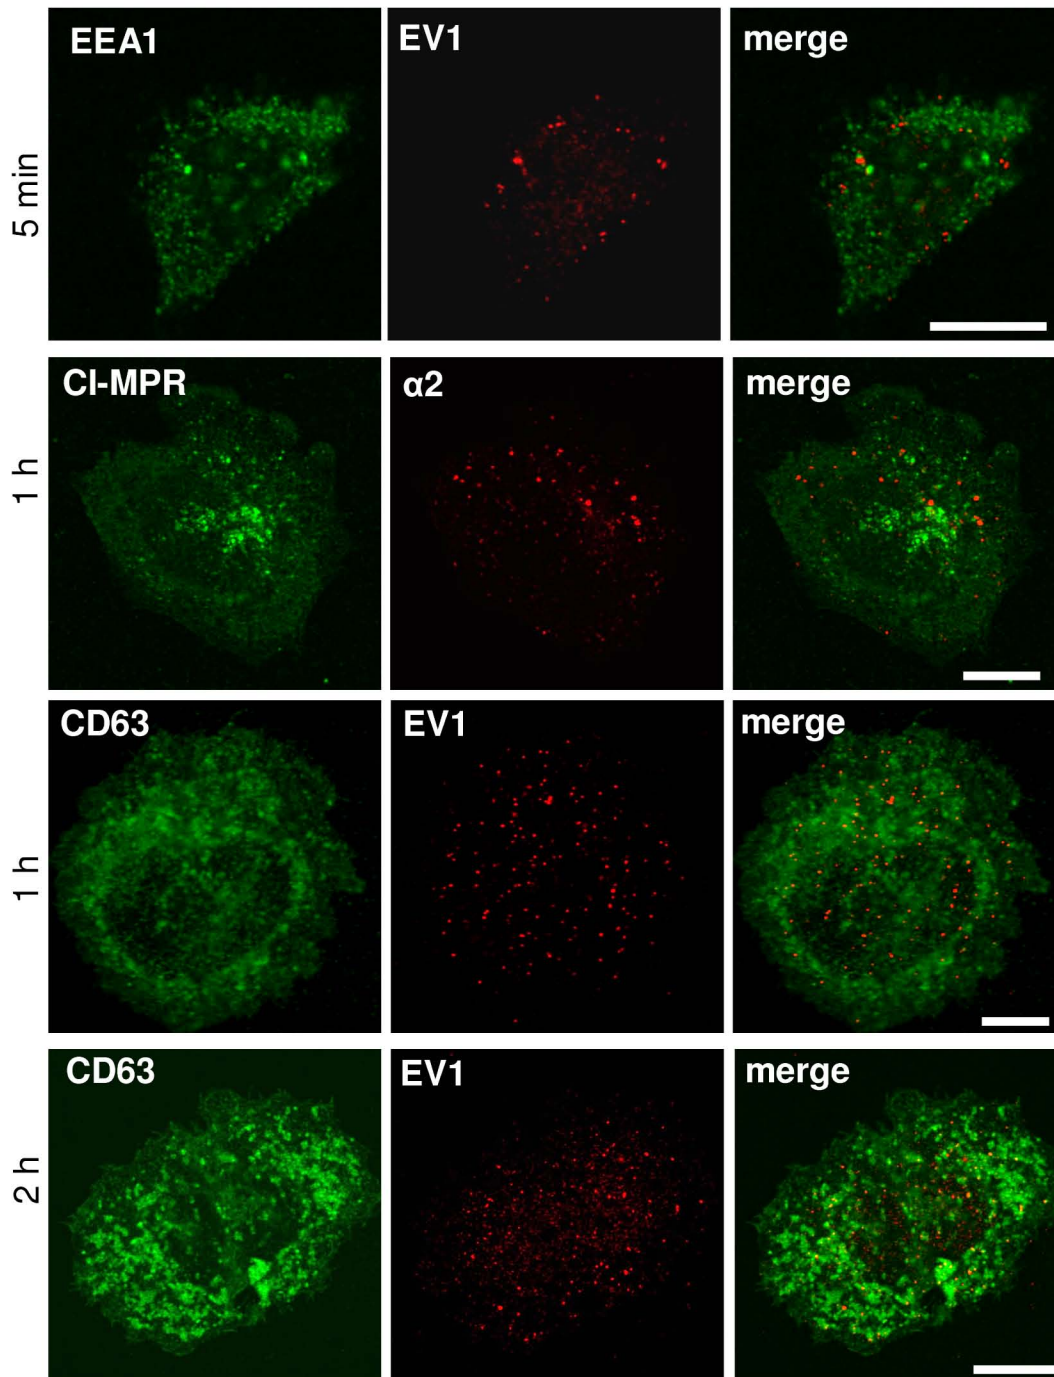

**B**

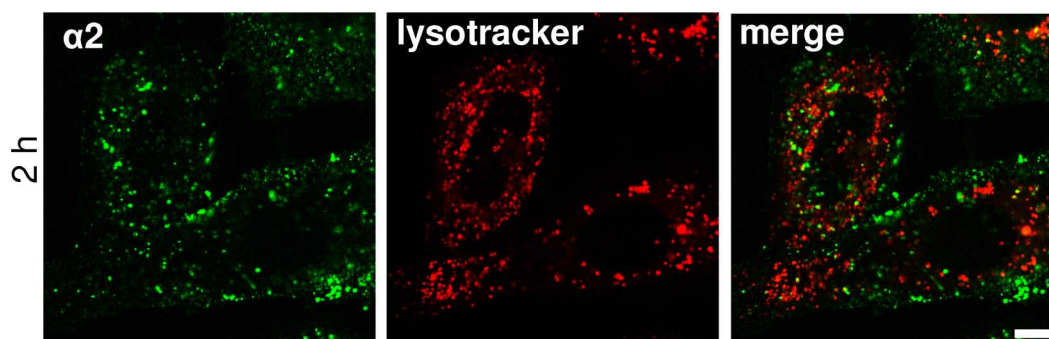

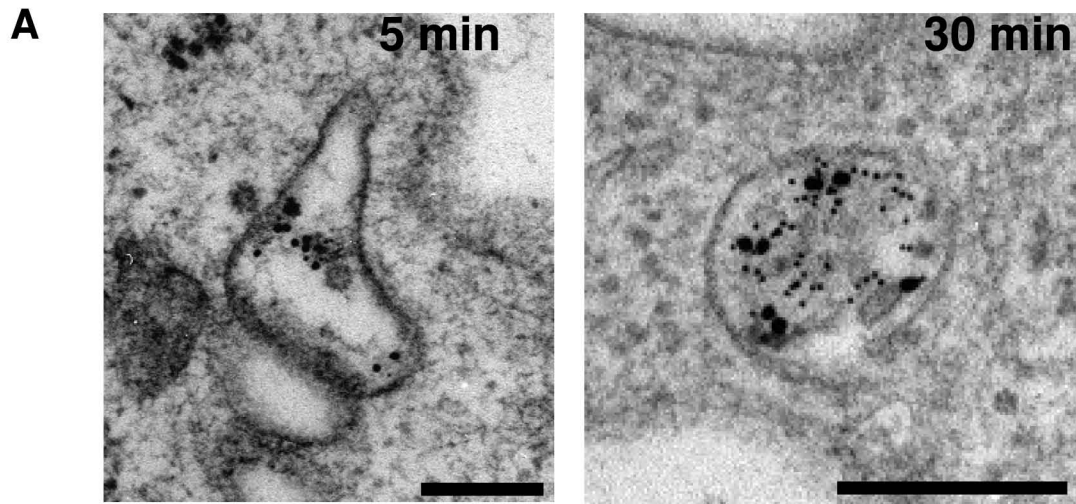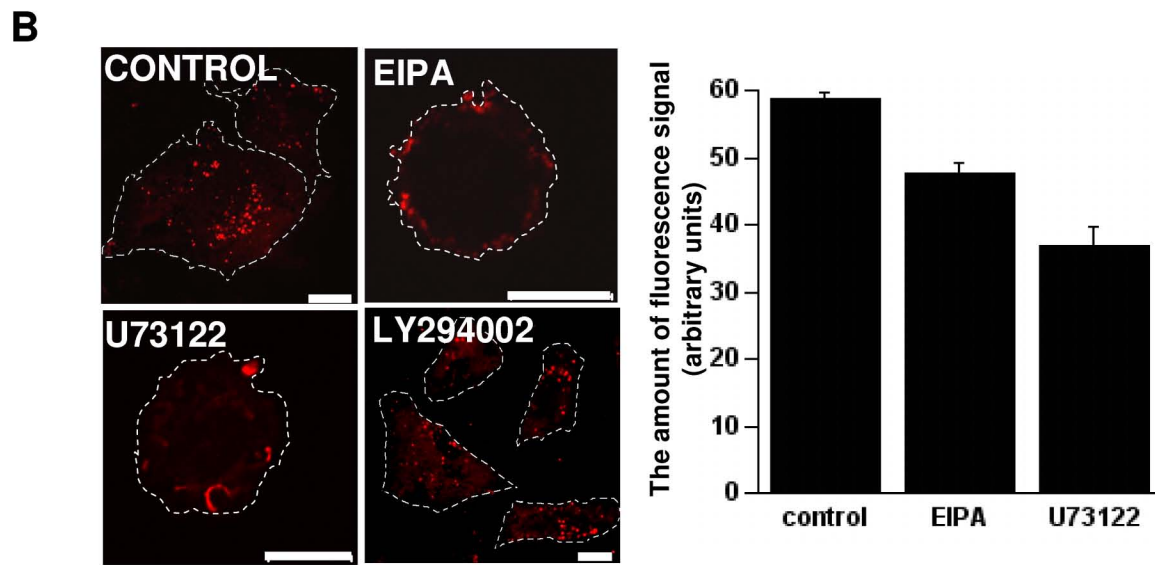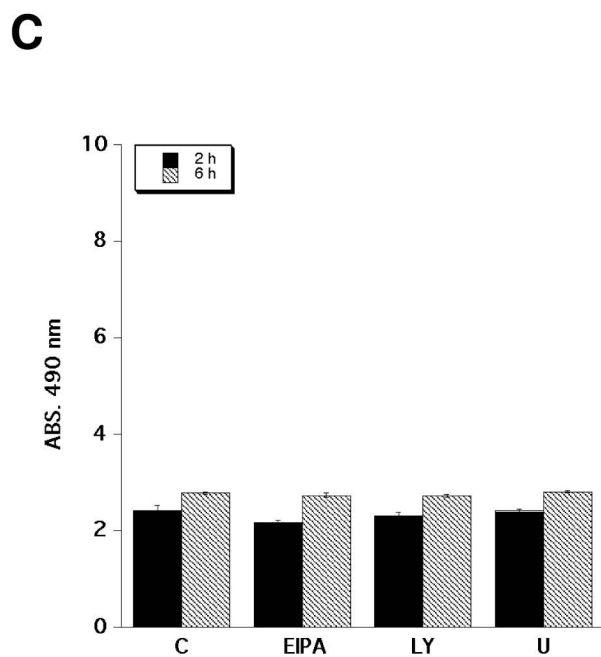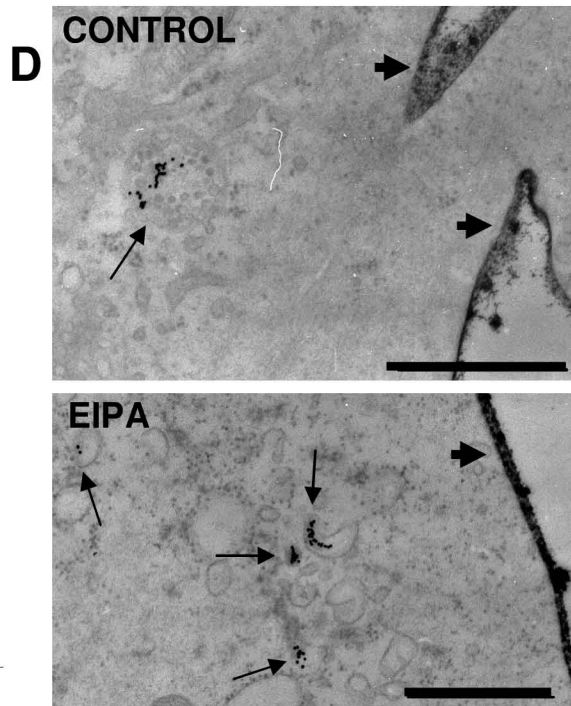

**A**

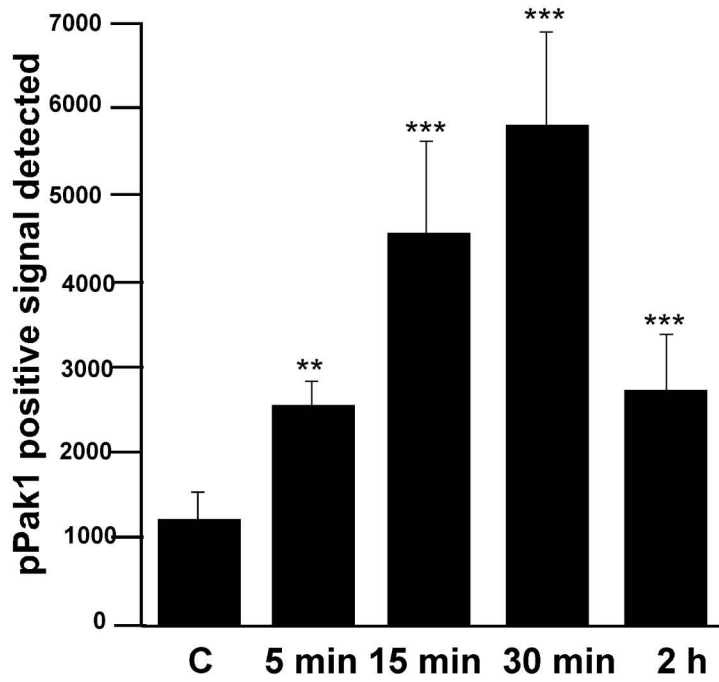

**B**

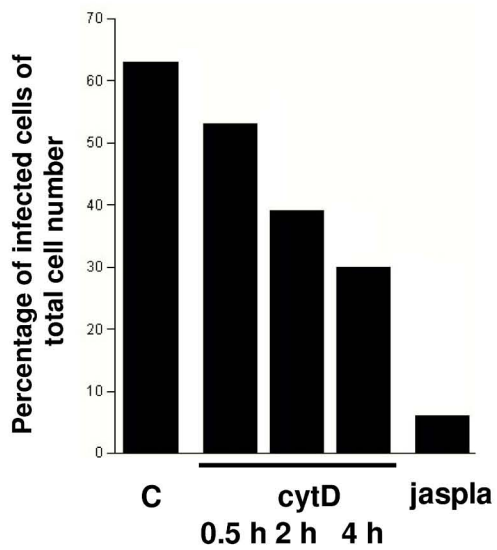

**C**

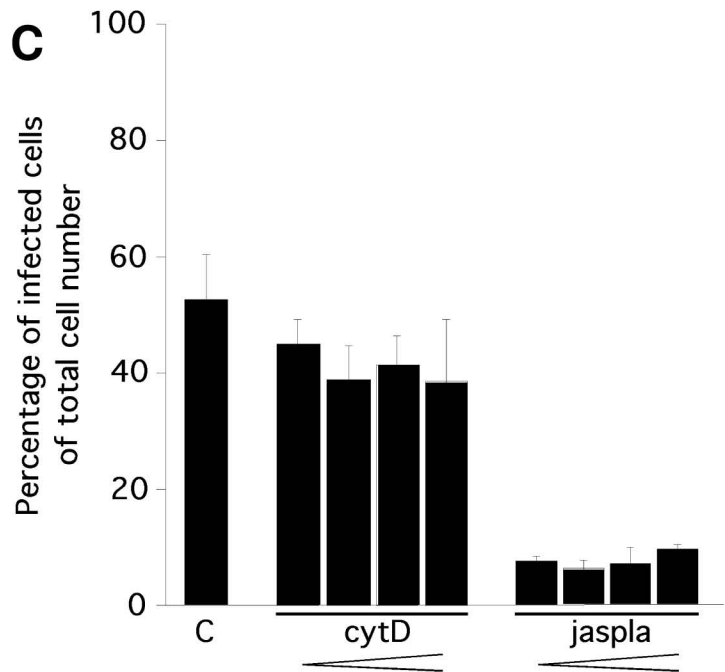

Supplement: E07-10-1094_1.pdf [file E07-10-1094_1.pdf]
